# Supplementary material for: Identification of an energy metabolism-related signature associated with clinical prognosis in diffuse glioma
Source: PubMed Central journal article supplement (PMC6286858; doi:10.18632/aging.101625), 2018-11-08
Supplement: aging-10-101625-s002.pdf [file aging-10-101625-s002.pdf]

**Supplementary Table 2. Univariate and multivariate Cox regression analysis of clinical pathologic features for OS in CGGA cohort.**

| Characteristics | Univariate analysis |             |                  | Multivariate analysis |             |                  |
|-----------------|---------------------|-------------|------------------|-----------------------|-------------|------------------|
|                 | HR                  | 95% CI      | <i>P</i> -value  | HR                    | 95% CI      | <i>P</i> -value  |
| Age             | 1.038               | 1.022-1.053 | <b>&lt;0.001</b> | 0.999                 | 0.983-1.016 | 0.914            |
| Gender          | 0.843               | 0.597-1.189 | 0.33             |                       |             |                  |
| Grade           | 3.469               | 2.709-4.443 | <b>&lt;0.001</b> | 2.097                 | 1.511-2.91  | <b>&lt;0.001</b> |
| Subtype         | 0.583               | 0.492-0.691 | <b>&lt;0.001</b> | 0.782                 | 0.659-0.929 | 0.005            |
| IDH             | 0.257               | 0.179-0.37  | <b>&lt;0.001</b> | 1.106                 | 0.566-2.159 | 0.768            |
| MGMT Promoter   | 0.529               | 0.374-0.75  | <b>&lt;0.001</b> | 0.78                  | 0.53-1.147  | 0.207            |
| Risk score      | 2.232               | 1.912-2.607 | <b>&lt;0.001</b> | 1.556                 | 1.161-2.086 | <b>0.003</b>     |

HR = hazard ratio; CI = confidence interval; IDH = isocitrate dehydrogenase; MGMT = methylguanine methyltransferase.
