# Supplementary material for: Identification of an energy metabolism-related signature associated with clinical prognosis in diffuse glioma
Source: PubMed Central journal article supplement (PMC6286858; doi:10.18632/aging.101625), 2018-11-08
Supplement: aging-10-101625-s003.pdf [file aging-10-101625-s003.pdf]

**Supplementary Table 3. Characteristics of patients in low-risk and high-risk groups in CGGA cohort.**

| Characteristics      | n   | Risk score |      | P-value          |
|----------------------|-----|------------|------|------------------|
|                      |     | Low        | High |                  |
| <b>Total Cases</b>   | 309 | 154        | 155  |                  |
| <b>Age</b>           |     |            |      |                  |
| ≤43                  | 166 | 112        | 54   | <b>&lt;0.001</b> |
| >43                  | 143 | 42         | 101  |                  |
| <b>Gender</b>        |     |            |      |                  |
| Male                 | 194 | 91         | 103  | 0.181            |
| Female               | 115 | 63         | 52   |                  |
| <b>Subtype</b>       |     |            |      |                  |
| Classical            | 69  | 8          | 61   | <b>&lt;0.001</b> |
| Mesenchymal          | 65  | 3          | 62   |                  |
| Proneural            | 99  | 86         | 13   |                  |
| Neural               | 76  | 57         | 19   |                  |
| <b>Grade</b>         |     |            |      |                  |
| II                   | 104 | 92         | 12   | <b>&lt;0.001</b> |
| III                  | 67  | 36         | 31   |                  |
| IV                   | 138 | 26         | 112  |                  |
| <b>IDH</b>           |     |            |      |                  |
| Mut                  | 155 | 136        | 19   | <b>&lt;0.001</b> |
| WT                   | 154 | 18         | 136  |                  |
| <b>MGMT promoter</b> |     |            |      |                  |
| Methylated           | 136 | 79         | 57   | <b>&lt;0.001</b> |
| Unmethylated         | 111 | 30         | 81   |                  |
| NA                   | 62  | 45         | 17   |                  |

IDH = isocitrate dehydrogenase; MGMT = methylguanine methyltransferase.
