# Supplementary material for: Identification of an energy metabolism-related signature associated with clinical prognosis in diffuse glioma
Source: PubMed Central journal article supplement (PMC6286858; doi:10.18632/aging.101625), 2018-11-08
Supplement: aging-10-101625-s012.pdf [file aging-10-101625-s012.pdf]

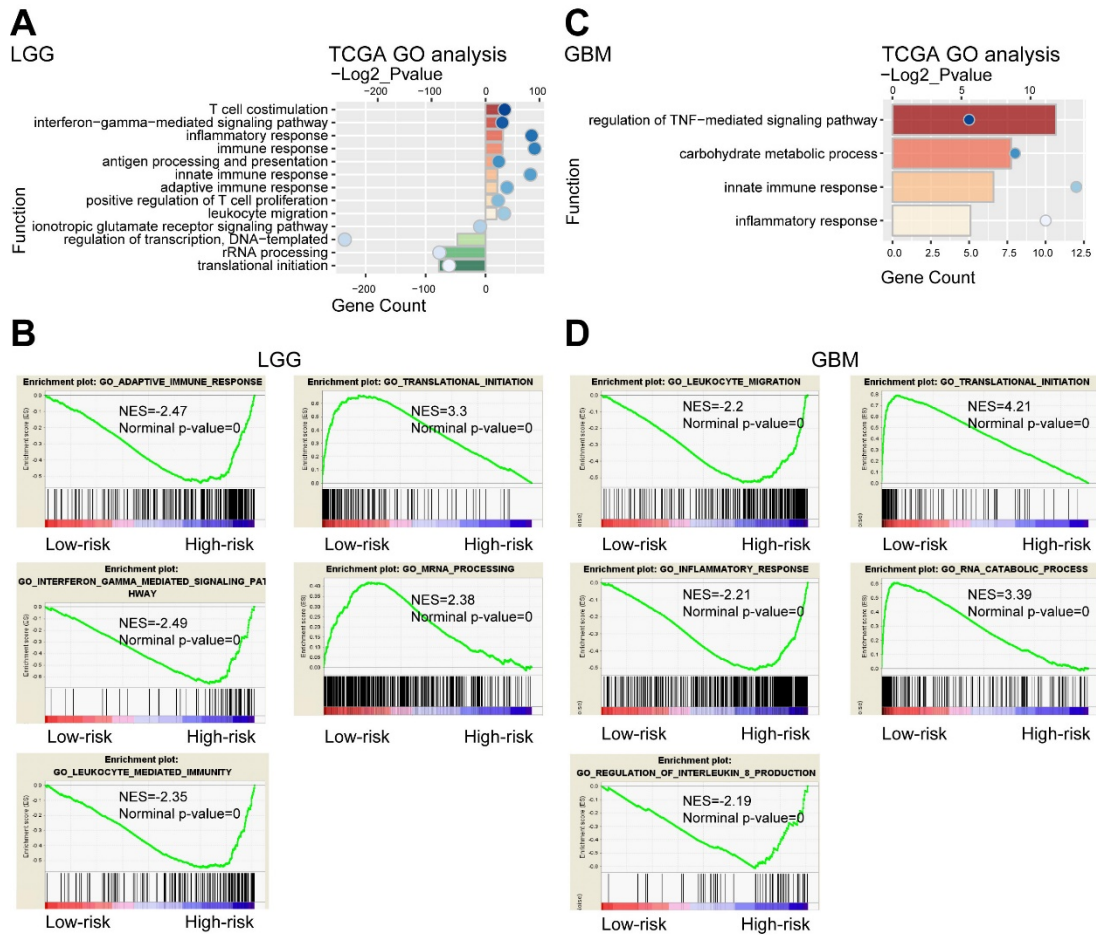

**Supplementary Figure 9. Functional analysis of the 29-gene signature in LGG and GBM of TCGA cohort. (A)** GO annotations based on the top 2000 genes positively and negatively associated with the 29-gene signature in LGG. **(B)** GSEA analysis based on the median value of risk score in LGG. **(C)** GO annotations based on the top 2000 genes positively and negatively associated with the 29-gene signature in GBM. **(D)** GSEA analysis based on the median value of risk score in GBM.
