# Supplementary material for: Identification of an energy metabolism-related signature associated with clinical prognosis in diffuse glioma
Source: publisher site journal article supplement (doi:10.18632/aging.101625), 2018-11-08
Supplement: Supplementary file [file aging-v10i11-101625-supplementary-material-SD1.pdf]

**Supplementary Table 1. Characteristics of patients in class 1 and class 2 in CGGA cohort.**

| <b>Characteristics</b> | <b>n</b> | <b>Class 1</b> | <b>Class 2</b> | <b>P-value</b>   |
|------------------------|----------|----------------|----------------|------------------|
| <b>Total Cases</b>     | 309      | 185            | 124            |                  |
| <b>Age</b>             |          |                |                |                  |
| ≤43                    | 166      | 80             | 86             | <b>&lt;0.001</b> |
| >43                    | 143      | 105            | 38             |                  |
| <b>Gender</b>          |          |                |                |                  |
| Male                   | 194      | 120            | 74             | 0.401            |
| Female                 | 115      | 65             | 50             |                  |
| <b>Subtype</b>         |          |                |                |                  |
| Classical              | 69       | 64             | 5              | <b>&lt;0.001</b> |
| Mesenchymal            | 65       | 65             | 0              |                  |
| Proneural              | 99       | 44             | 55             |                  |
| Neural                 | 76       | 12             | 64             |                  |
| <b>Grade</b>           |          |                |                |                  |
| II                     | 104      | 17             | 87             | <b>&lt;0.001</b> |
| III                    | 67       | 41             | 26             |                  |
| IV                     | 138      | 127            | 11             |                  |
| <b>IDH</b>             |          |                |                |                  |
| Mut                    | 155      | 51             | 104            | <b>&lt;0.001</b> |
| WT                     | 154      | 134            | 20             |                  |
| <b>MGMT promoter</b>   |          |                |                |                  |
| Methylated             | 136      | 79             | 57             | <b>&lt;0.001</b> |
| Unmethylated           | 111      | 81             | 30             |                  |
| NA                     | 62       | 25             | 37             |                  |

IDH = isocitrate dehydrogenase; MGMT = methylguanine methyltransferase.
