# Supplementary material for: Identification of an energy metabolism-related signature associated with clinical prognosis in diffuse glioma
Source: publisher site journal article supplement (doi:10.18632/aging.101625), 2018-11-08
Supplement: Supplementary file [file aging-v10i11-101625-supplementary-material-SD4.pdf]

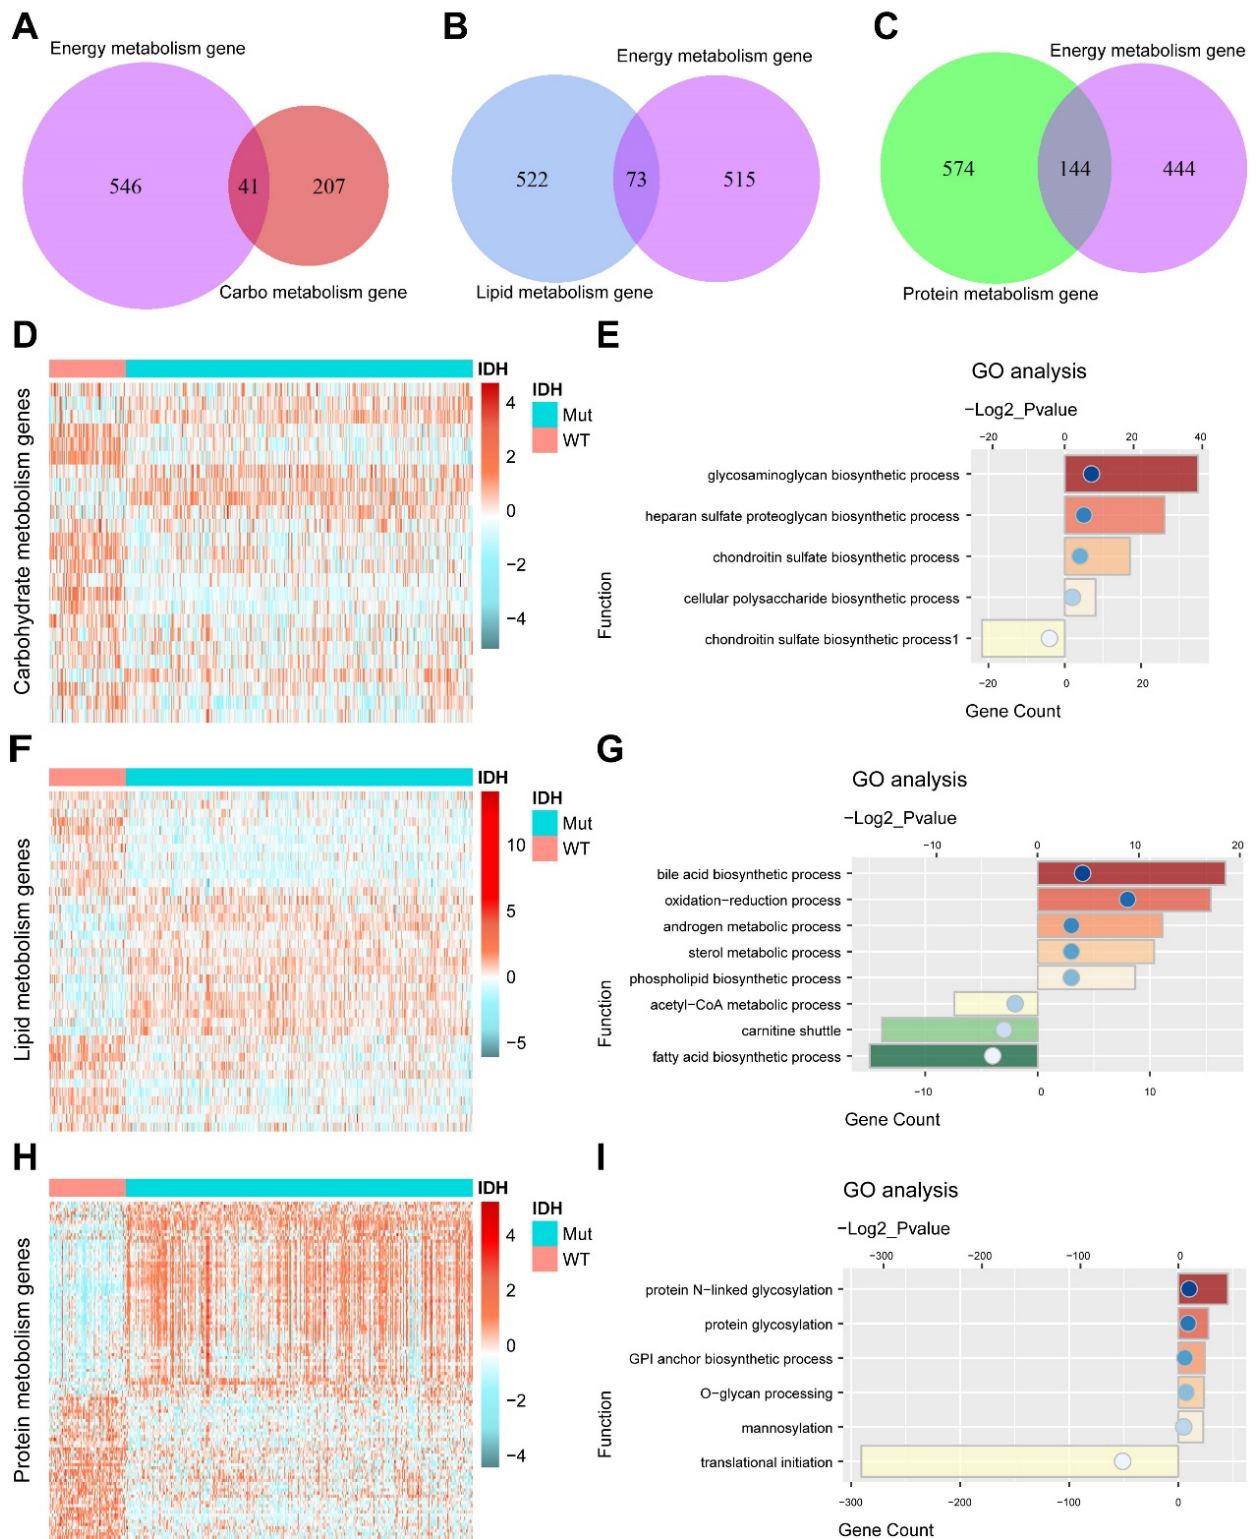

**Supplementary Figure 1. Profile of carbohydrate, lipid and protein metabolism genes involved in energy metabolism between IDH-wt and IDH-mut LGG.** (A-C) Venn diagrams show carbohydrate, lipid and protein metabolism genes involved in energy metabolism. (D and E) Heat map and GO analysis of differentially expressed carbohydrate metabolism genes between IDH-wt and IDH-mut LGG. (F and G) Heat map and GO analysis of differentially expressed lipid metabolism genes. (H and I) Heat map and GO analysis of differentially expressed protein metabolism genes.
