# Supplementary material for: Identification of an energy metabolism-related signature associated with clinical prognosis in diffuse glioma
Source: publisher site journal article supplement (doi:10.18632/aging.101625), 2018-11-08
Supplement: Supplementary file [file aging-v10i11-101625-supplementary-material-SD5.pdf]

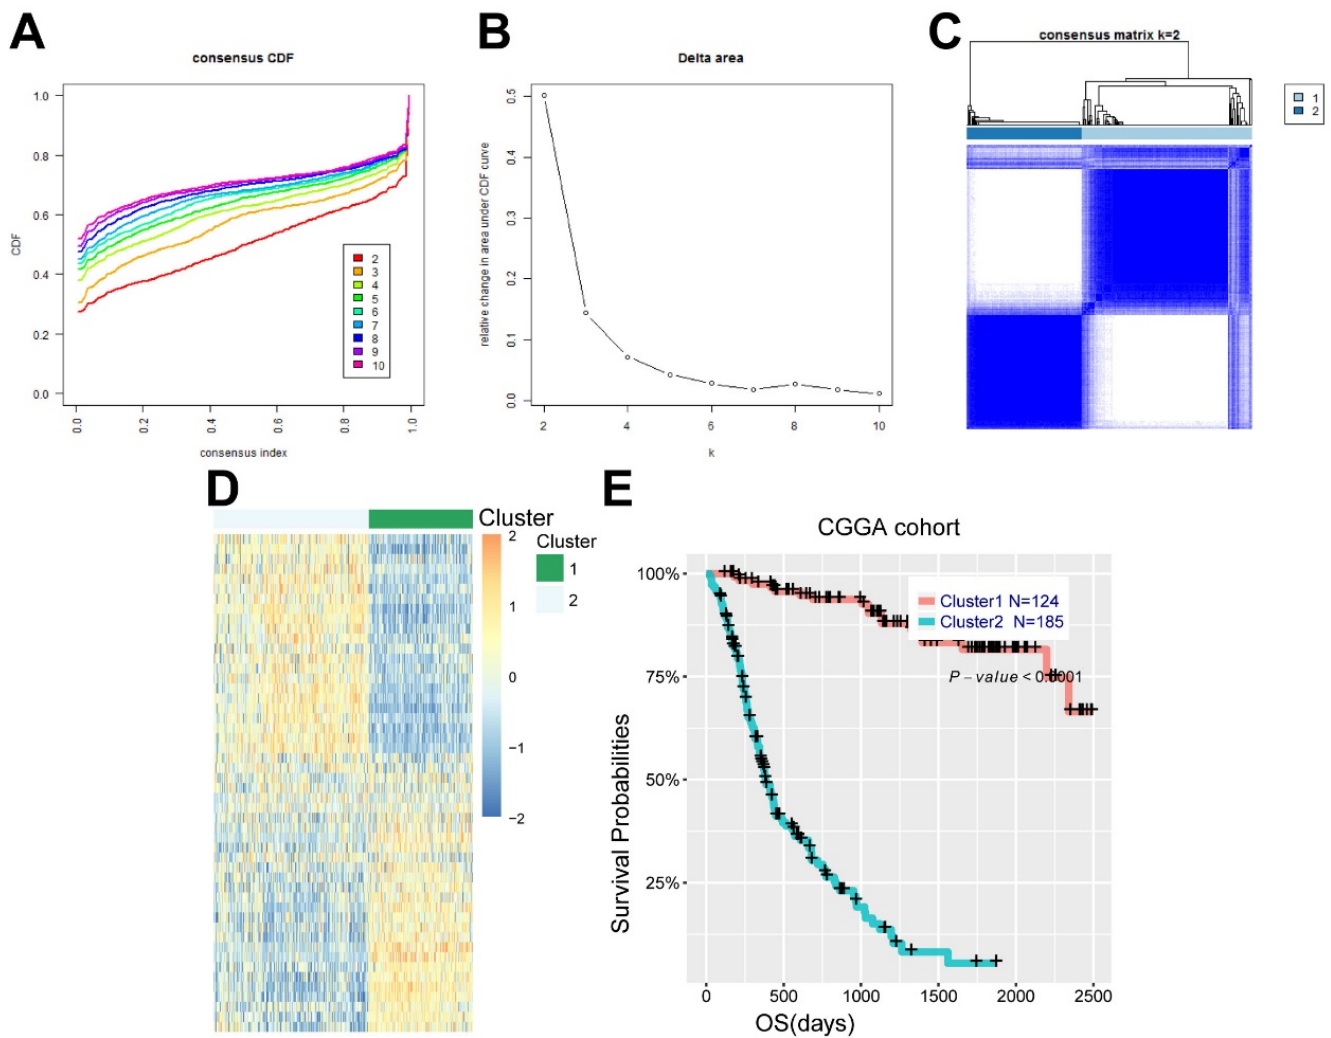

**Supplementary Figure 2. Energy metabolism-related genes could distinguish glioma patients with different clinical and molecular features.** (A) Consensus clustering CDF for  $k = 2$  to  $k = 10$ . (B) Relative change in area under CDF curve for  $k = 2$  to  $k = 10$ . (C) Consensus clustering matrix of 309 samples from CGGA dataset for  $k = 2$ . (D) Heat map of two clusters defined by the top 50 variable expression genes. (E) survival analysis of patients in cluster 1 and cluster 2.
