# Supplementary material for: Identification of an energy metabolism-related signature associated with clinical prognosis in diffuse glioma
Source: publisher site journal article supplement (doi:10.18632/aging.101625), 2018-11-08
Supplement: Supplementary file [file aging-v10i11-101625-supplementary-material-SD7.pdf]

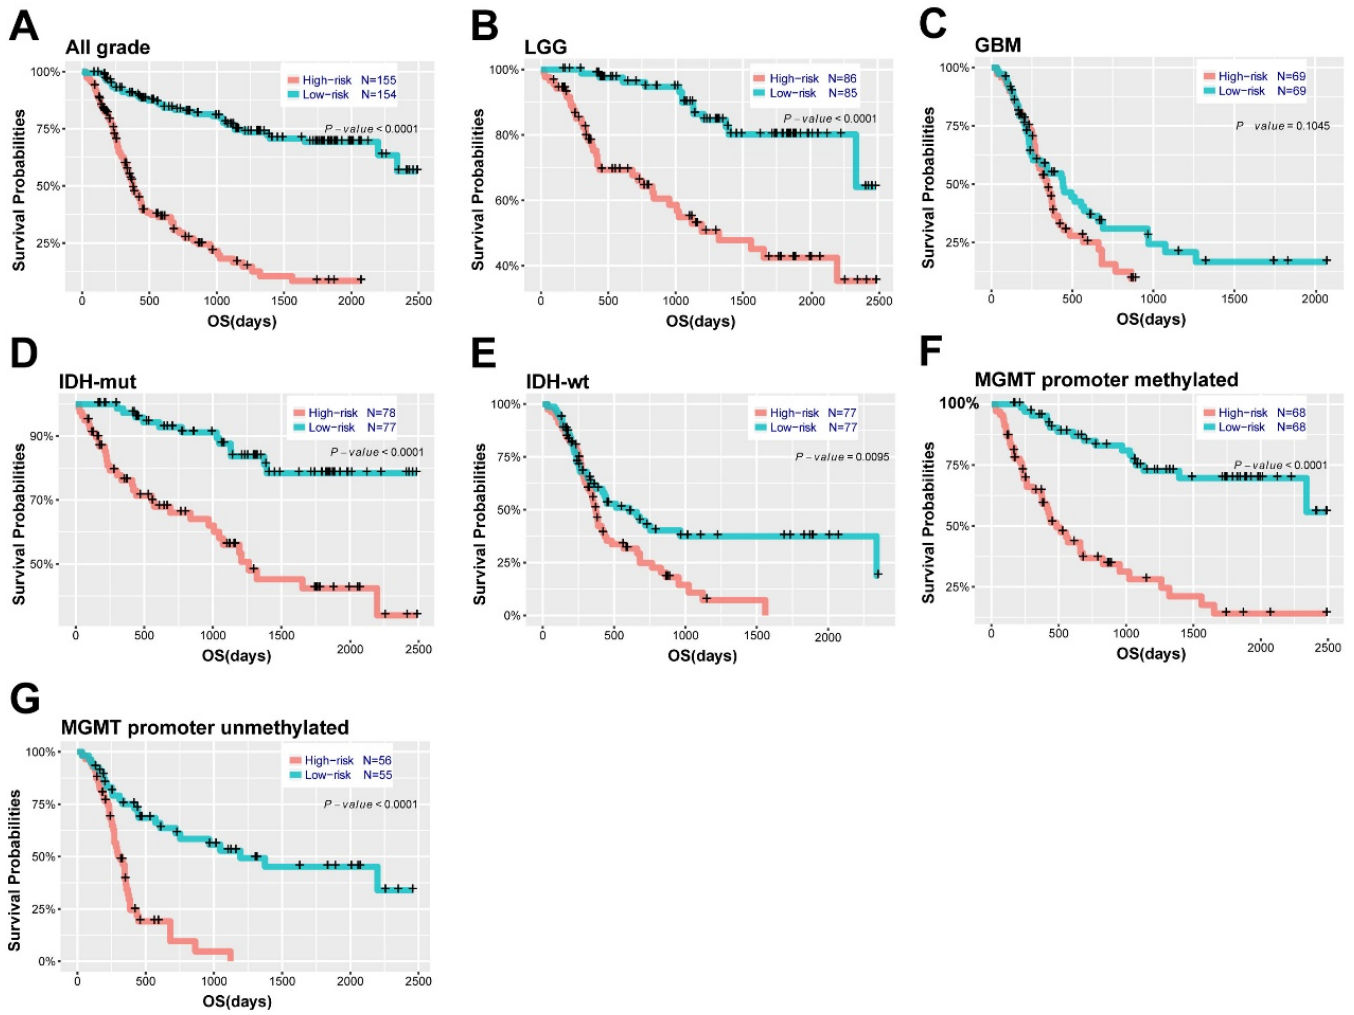

**Supplementary Figure 4. Prognostic evaluation of the 29-gene signature in stratified patients of CGGA cohort. (A-G)** Survival analysis of the signature in patients stratified by grade, IDH and MGMT promoter status.
