# Supplementary material for: Identification of an energy metabolism-related signature associated with clinical prognosis in diffuse glioma
Source: publisher site journal article supplement (doi:10.18632/aging.101625), 2018-11-08
Supplement: Supplementary file [file aging-v10i11-101625-supplementary-material-SD8.pdf]

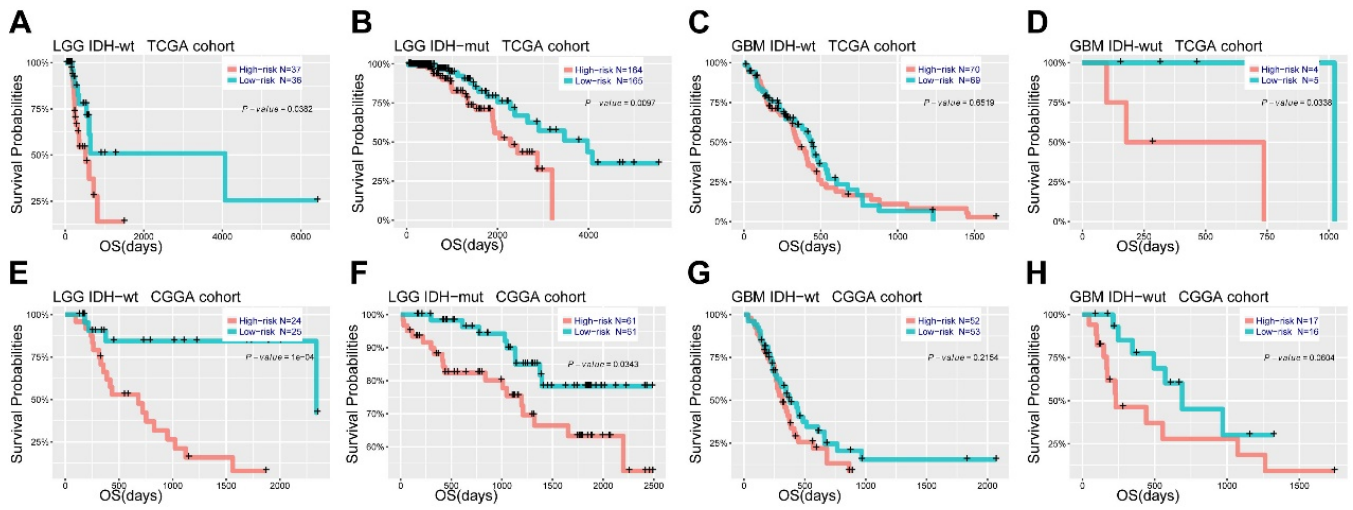

**Supplementary Figure 5. Prognostic evaluation of the 29-gene signature in molecular subgroups.** (A-D) Survival analysis of the signature in LGG IDH-wt, LGG IDH-mut, GBM IDH-wt and GBM IDH-mut patients of TCGA cohort. (E-H) Survival analysis of the signature in LGG IDH-wt, LGG IDH-mut, GBM IDH-wt and GBM IDH-mut patients of CGGA cohort.
