# Supplementary material for: Identification of an energy metabolism-related signature associated with clinical prognosis in diffuse glioma
Source: publisher site journal article supplement (doi:10.18632/aging.101625), 2018-11-08
Supplement: Supplementary file [file aging-v10i11-101625-supplementary-material-SD9.pdf]

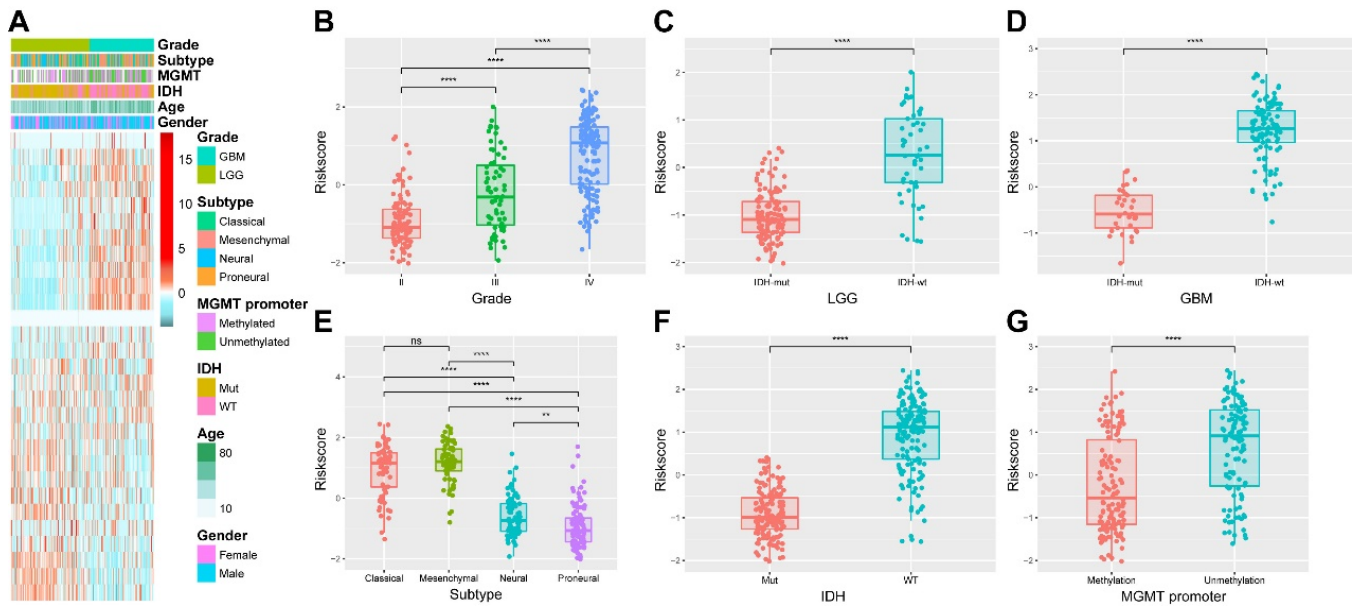

**Supplementary Figure 6. Association between the energy metabolism-related signature and clinical features in CGGA cohort. (A)** Heatmap of the 29 genes of the signature based on the risk score value. **(B-G)** Distribution of the risk score in stratified patients by grade, subtype, IDH and MGMT promoter status.
