# Supplementary material for: Identification of an energy metabolism-related signature associated with clinical prognosis in diffuse glioma
Source: publisher site journal article supplement (doi:10.18632/aging.101625), 2018-11-08
Supplement: Supplementary file [file aging-v10i11-101625-supplementary-material-SD11.pdf]

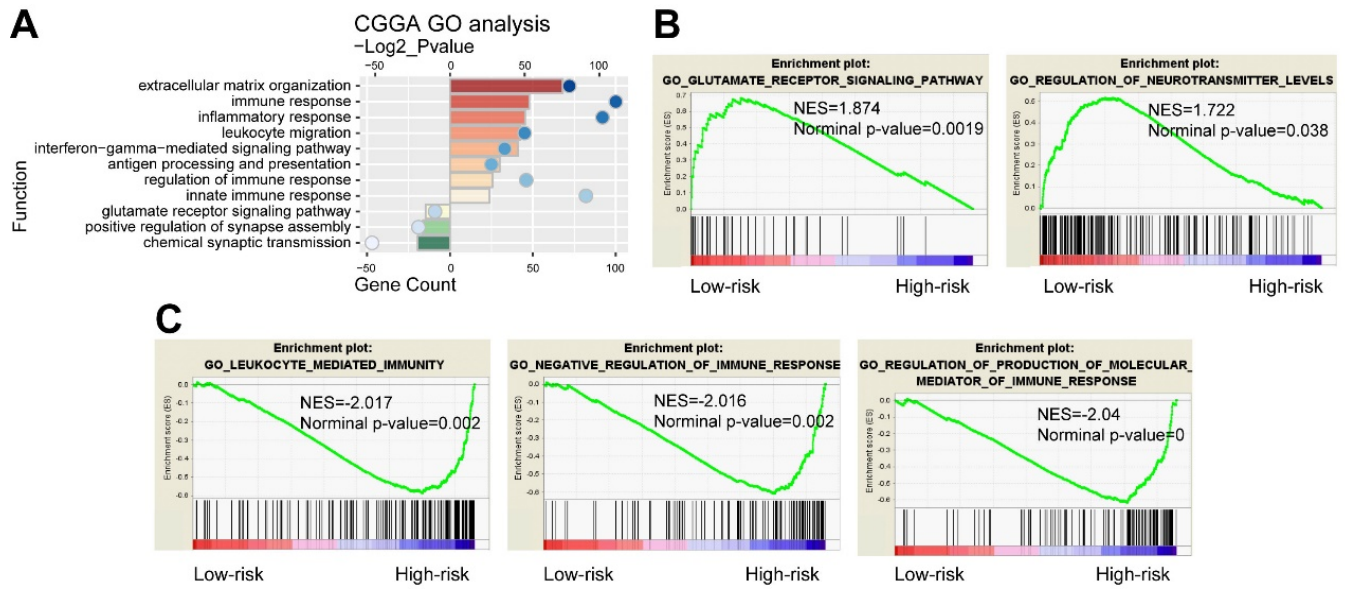

**Supplementary Figure 8. Functional analysis of the 29-gene signature in CGGA cohort. (A)** GO annotations based on the top 2000 genes positively and negatively associated with the 29-gene signature. **(B-C)** GSEA analysis based on the median value of risk score.
