# Supplementary material for: Identification of an energy metabolism-related signature associated with clinical prognosis in diffuse glioma
Source: publisher site journal article supplement (doi:10.18632/aging.101625), 2018-11-08
Supplement: Supplementary file [file aging-v10i11-101625-supplementary-material-SD13.pdf]

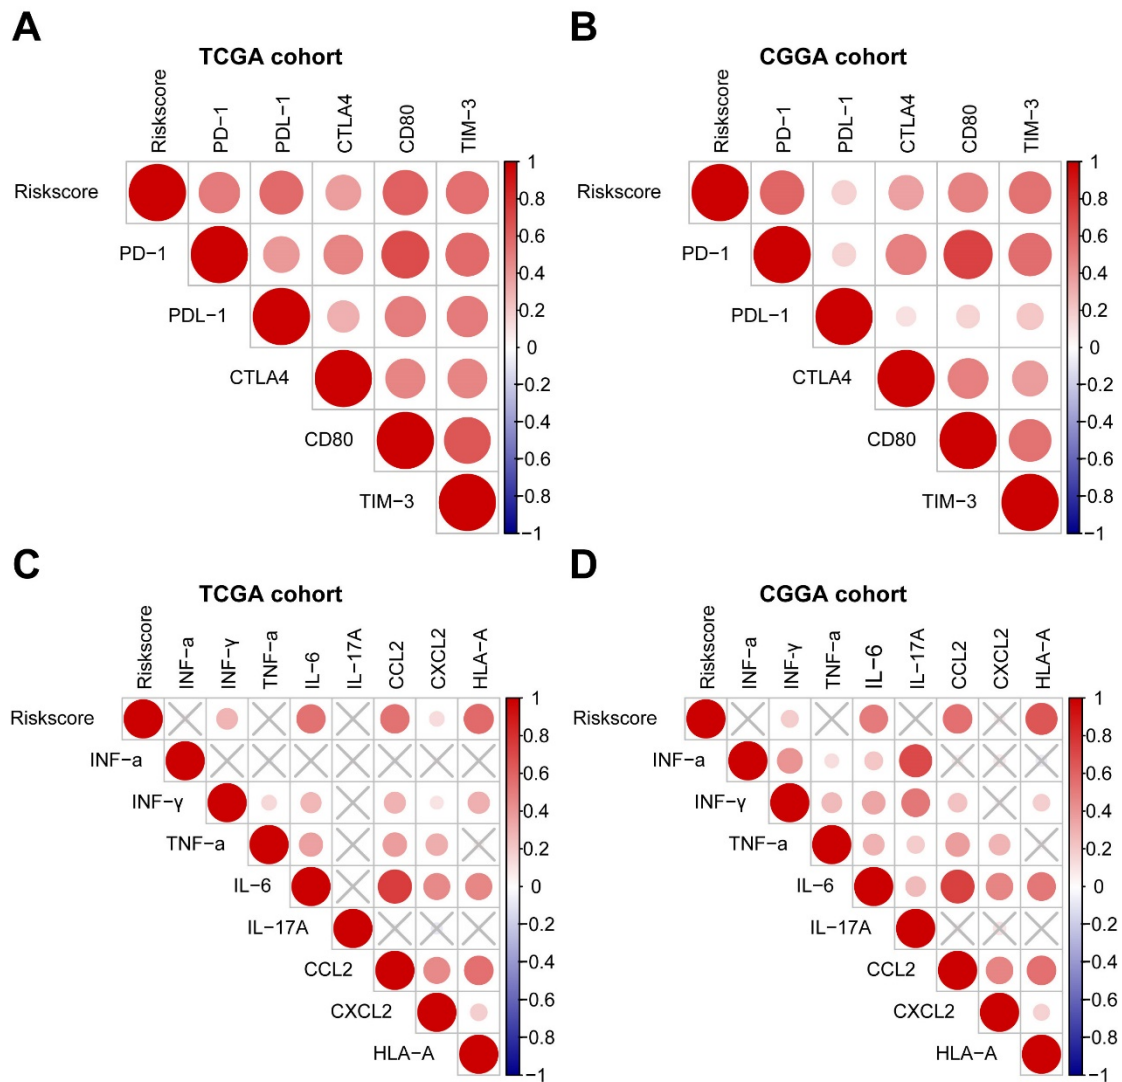

**Supplementary Figure 10. Association between the energy metabolism-related signature and immune, inflammatory responses.** (A-B) Correlation analysis between risk score and immune checkpoints. (C-D) Correlation analysis between risk score and inflammatory genes.
